# Supplementary material for: Juvenile Recurrent Parotitis: Video-Documented Sialendoscopy
Source: J Clin Med. 2023 Oct 30;12(21):6842. doi: 10.3390/jcm12216842 (PMC10649241; doi:10.3390/jcm12216842)
Supplement: Supplementary file 1 [file jcm-12-06842-s001.zip]

Archive with 4 entries (4 files):
- jcm-2585259-supplementary.pdf
- VIDEO S1.1.mp4
- VIDEO S1.2.mp4
- VIDEO S2.mp4
